# Supplementary material for: C57BL/6 Background Attenuates mHTT Toxicity in the Striatum of YAC128 Mice
Source: Preprints.org preprint supplement (doi:10.20944/preprints202111.0049.v1), 2021-11-02
Supplement: Supplementary file 1 [file supplementary]

**Supplemental Figure 1: Functional synapses are not impaired in 3-month-old and 18-month-old YAC128/BL6 mice**

**
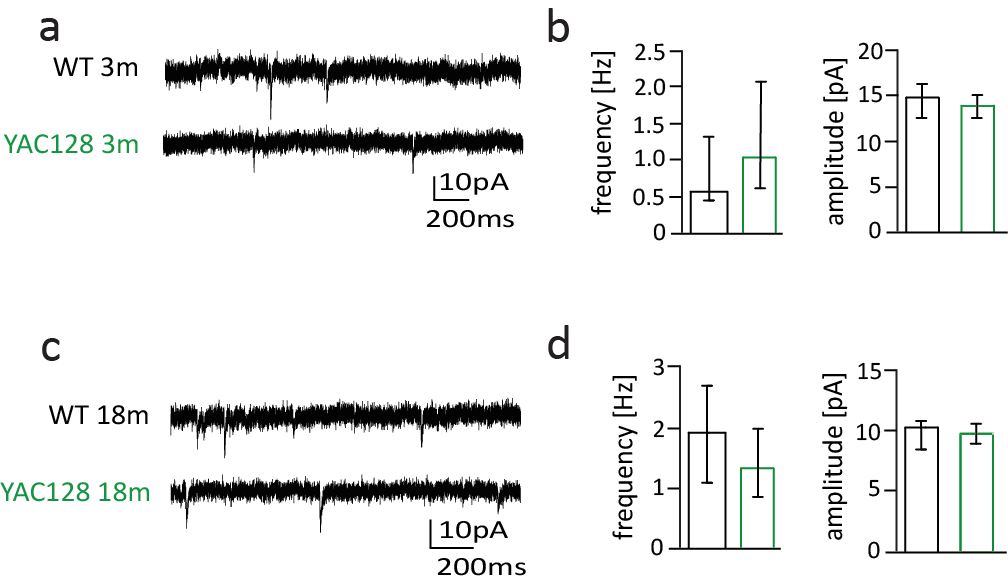
**

(a) Sample traces of mEPSC recordings from MSNs of 3-month-old WT and YAC128/BL6 mice. (b) Bar graphs of mEPSC frequency and peak amplitudes of MSNs from 3-month-old WT (n= 12) and YAC128/BL6 (n=25) mice. (c) Sample traces of mEPSC recordings from MSNs of 18-month old WT and YAC128/BL6 mice. (d) Bar graphs of mEPSC frequency and peak amplitudes of MSNs from 18-month-old WT (n= 27) and YAC128/BL6 (n=24) mice. Bar graphs depict median ± IQR.
